# Supplementary material
Source: publisher figshare collection journal article supplement (https://gsajournals.figshare.com/ndownloader/files/13273844)
Supplement: Supplementary file 1 [file 13273844]

## Sheet: ME.motifs
Table S6. Transcription factor motifs enriched in module H3K4me3 peaks.
Module	# of Motifs
ME1	1
ME2	0
ME3	20
ME4	5
ME5	0
ME6	0
ME7	10
ME8	0
ME9	48
ME10	1
ME11	3
ME12	0
ME13	0
ME14	0

## Sheet: ME1
Motif	TF	Name	Location	Adj. P-value
SARRYCTCGCGAGAV	Zbtb33	zinc finger and BTB domain containing 33	ChrX:38189812-38194684	0.00573

## Sheet: ME3
Motif	TF	Name	Location	Adj. P-value
CAAVATGGCGGC	Yy1	YY1 transcription factor	Chr12:108792973-108816632	8.978e-29
GGCMGCCATTTT	Zfp42	zinc finger protein 42	Chr8:43295063-43306980	1.459e-20
BTGTTTACN	Foxp2	forkhead box P2	Chr6:14901388-15441201	5.315e-10
TTTTATKRCHYY	Evx2	even-skipped homeobox 2	Chr2:74652991-74659557	7.506e-08
VAARAWGGCGGMGG	Taf1	TATA-box binding protein associated factor 1	ChrX:101532734-101601034	8.384e-08
VCTGATTRV	Lhx6	LIM homeobox protein 6	Chr2:36081953-36105408	9.144e-08
SYTGTTTACH	Foxo3	forkhead box O3	Chr10:42181841-42276755	3.894e-07
TTTTATKRCYYT	Cdx2	caudal type homeobox 2	Chr5:147300805-147307270	2.056e-06
YRRCCAATSAGMR	Nfyb	nuclear transcription factor-Y beta	Chr10:82748701-82764144	1.13e-05
BYARCCAATCAGAR	Nfyc	nuclear transcription factor-Y gamma	Chr4:120757438-120831572	1.258e-05
BYRRCCAATCAGAR	Nfya	nuclear transcription factor-Y alpha	Chr17:48386885-48409906	3.328e-05
YTMATGAATATWY	Pou1f1	POU domain, class 1, transcription factor 1	Chr16:65520511-65534297	9.688e-05
SBTGTTTACNY	Foxk1	forkhead box K1	Chr5:142401497-142462011	0.0001243
YTBTGATTGGYY	Foxi1	forkhead box I1	Chr11:34204338-34208089	0.0006221
STATAAAARS	Tbp	TATA box binding protein	Chr17:15499888-15528379	0.0007092
YBYTGATTGRYTGR	Pbx3	pre B cell leukemia homeobox 3	Chr2:34171457-34373142	0.00117
TTKCGHAATMTB	Cebpe	CCAAT/enhancer binding protein (C/EBP), epsilon	Chr14:54710363-54712174	0.001627
KBBTGTTTAC	Foxo1	forkhead box O1	Chr3:52268336-52353221	0.003357
CWSTGCGCATGCGCVRS	Nrf1	nuclear respiratory factor 1	Chr6:30047988-30153458	0.004198
CTCATGMATATKYAWD	Pou3f1	POU domain, class 3, transcription factor 1	Chr4:124656807-124660655	0.009888

## Sheet: ME4
Motif	TF	Name	Location	Adj. P-value
TTTTATKRCHYY	Evx2	even-skipped homeobox 2	Chr2:74652991-74659557	5.74e-06
CTGCGGCARR	Zfp57	zinc finger protein 57	Chr17:37001163-37010635	5.02e-05
TTTTATKRCYYT	Cdx2	caudal type homeobox 2	Chr5:147300805-147307270	0.000142
TGATTTATKGCYW	Evx1	even-skipped homeobox 1	Chr6:52313498-52318378	0.00108
BTGTTTACN	Foxp2	forkhead box P2	Chr6:14901388-15441201	0.008

## Sheet: ME7
Motif	TF	Name	Location	Adj. P-value
SYTGTTTACH	Foxo3	forkhead box O3	Chr10:42181841-42276755	2.418e-09
CTGCGGCARR	Zfp57	zinc finger protein 57	Chr17:37001163-37010635	3.277e-08
CAAVATGGCGGC	Yy1	YY1 transcription factor	Chr12:108792973-108816632	7.101e-07
BTGTTTACN	Foxp2	forkhead box P2	Chr6:14901388-15441201	1.697e-06
KBBTGTTTAC	Foxo1	forkhead box O1	Chr3:52268336-52353221	1.413e-05
YTTCCHVAGAAMYS	Stat6	signal transducer and activator of transcription 6	Chr10:127642986-127660957	3.913e-05
SGCGCSAAAH	E2f5	E2F transcription factor 5	Chr3:14578641-14606309	0.0009007
SBTGTTTACNY	Foxk1	forkhead box K1	Chr5:142401497-142462011	0.001958
GGTGGGGTGAB	Srebf1	sterol regulatory element binding transcription factor 1	Chr11:60199089-60222581	0.00203
GGCMGCCATTTT	Zfp42	zinc finger protein 42	Chr8:43295063-43306980	0.002532

## Sheet: ME9
Motif	TF	Name	Location	Adj. P-value
VTACGTGMC	Epas1	endothelial PAS domain protein 1	Chr17:86753907-86833410	8.482e-11
BYRCGTGC	Arnt	aryl hydrocarbon receptor nuclear translocator	Chr3:95434388-95497237	2.928e-10
YCWYGTGACY	Mitf	melanogenesis associated transcription factor	Chr6:97807052-98021349	3.581e-09
SYCTSHCWSCWS	Smad3	SMAD family member 3	Chr9:63646767-63757994	5.706e-09
CWGHCACGTGMVVM	Clock	circadian locomotor output cycles kaput	Chr5:76209868-76304792	3.001e-08
GDACGTGM	Hif1a	hypoxia inducible factor 1, alpha subunit	Chr12:73901375-73947530	4.828e-08
VTGACGTCAS	Atf1	activating transcription factor 1	Chr15:100227819-100261244	5.511e-08
MCACGTGMC	Arntl	aryl hydrocarbon receptor nuclear translocator-like	Chr7:113207465-113314126	2.877e-07
GGGTCACGTGRBSVSSSSB	Usf2	upstream transcription factor 2	Chr7:30945248-30956803	3.805e-07
RGTCACGTG	Tfeb	transcription factor EB	Chr17:47737030-47792419	7.421e-07
GGTGGGGTGAB	Srebf1	sterol regulatory element binding transcription factor 1	Chr11:60199089-60222581	1.938e-06
RCACGTGAS	Bhlhe40	basic helix-loop-helix family, member e40	Chr6:108660629-108666925	3.501e-06
GCVGGAAGYG	Fev	FEV (ETS oncogene family)	Chr1:74881509-74885419	3.979e-06
YCCCAGGGRA	Prdm16	PR domain containing 16	Chr4:154316125-154636873	4.756e-06
GGVRCCGGAAGYGS	Fli1	Friend leukemia integration 1	Chr9:32422204-32542861	4.949e-06
RRGGTCABHTRAGGWCA	Thra	thyroid hormone receptor alpha	Chr11:98740638-98769006	5.64e-06
SMCAGCTGCWB	Tcf3	transcription factor 3	Chr10:80409514-80433647	1.04e-05
CASCTGC	Myf6	myogenic factor 6	Chr10:107492860-107494729	1.073e-05
RGCAGGTGKG	Tcf12	transcription factor 12	Chr9:71842688-72111871	1.451e-05
CCAKCTGYTYYCTB	Lyl1	lymphoblastomic leukemia 1	Chr8:84701457-84704715	1.572e-05
RGTCACGTGA	Tfe3	transcription factor E3	ChrX:7762560-7775202	1.586e-05
VCACGTGGSNGSBGS	Mxi1	MAX interactor 1, dimerization protein	Chr19:53310506-53375810	1.744e-05
GGVRCCGGAAGTGV	Gabpa	GA repeat binding protein, alpha	Chr16:84834925-84863779	2.044e-05
RGGTCASVRTGVCMTGRV	Rarg	retinoic acid receptor, gamma	Chr15:102234938-102257517	2.188e-05
BYSTGGGAAAV	Rbpj	recombination signal binding protein for immunoglobulin kappa J region	Chr5:53466152-53657362	3.079e-05
SRRCCGGAAGYRG	Elk4	ELK4, member of ETS oncogene family	Chr1:132007607-132032612	3.501e-05
SCACGTGG	Mycn	v-myc avian myelocytomatosis viral related oncogene, neuroblastoma derived	Chr12:12936096-12941914	3.587e-05
CRVTGACGTCA	Crem	cAMP responsive element modulator	Chr18:3266048-3337748	8.708e-05
CAAVATGGCGGC	Yy1	YY1 transcription factor	Chr12:108792973-108816632	0.0001306
RCCGGAAGTGV	Elk1	ELK1, member of ETS oncogene family	ChrX:20933395-20950608	0.0002357
DTYGCGTGM	Ahr	aryl-hydrocarbon receptor	Chr12:35497974-35535038	0.000288
VVRCMGGAAGYRVV	Erg	ETS transcription factor	Chr16:95359169-95586593	0.0003045
SRGTCACGTGRCS	Usf1	upstream transcription factor 1	Chr1:171411313-171419142	0.000453
SRACCCGGAAGTGS	Elf1	E74-like factor 1	Chr14:79481194-79582476	0.000478
GAGCCTGSTACWSWGCCTGR	Zfp322a	zinc finger protein 322A	Chr13:23353103-23369208	0.0006194
VRRRCMGGAAGTGG	Ets1	E26 avian leukemia oncogene 1, 5' domain	Chr9:32636221-32757820	0.0007186
MGCCACGTGSBC	Myc	myelocytomatosis oncogene	Chr15:61985391-61990374	0.0009338
SVSCACGTGGC	Max	Max protein	Chr12:76937269-76962201	0.001368
RGACATGCCCRGGCADGYCC	Trp53	transformation related protein 53	Chr11:69580359-69591873	0.002514
GGGKTGCCC	Hic1	hypermethylated in cancer 1	Chr11:75164565-75169519	0.002556
SAGGAAGT	Etv4	ets variant 4	Chr11:101769747-101785371	0.002633
NRRTGACGTMA	Creb1	cAMP responsive element binding protein 1	Chr1:64532645-64604548	0.002962
GGCYHCCTGCTGWGH	Zic3	zinc finger protein of the cerebellum 3	ChrX:58022700-58041736	0.004653
TCTGYCTGB	Smad2	SMAD family member 2	Chr18:76241580-76305731	0.005035
RRTGABGTCAY	Atf2	activating transcription factor 2	Chr2:73816509-73892639	0.006311
VDRVKCAGYSRAGCGTGAC	Pax5	paired box 5	Chr4:44524757-44710487	0.007409
CHSCAGCTGYYYB	Myog	myogenin	Chr1:134289989-134292548	0.008149
VSGTGGGGWGABG	Srebf2	sterol regulatory element binding factor 2	Chr15:82147269-82205379	0.008858

## Sheet: ME10
Motif	TF	Name	Location	Adj. P-value
BYRCGTGC	Arnt	aryl hydrocarbon receptor nuclear translocator	Chr3:95434388-95497237	0.000183

## Sheet: ME11
Motif	TF	Name	Location	Adj. P-value
CAAVATGGCGGC	Yy1	YY1 transcription factor	Chr12:108792973-108816632	1.09e-07
GGCMGCCATTTT	Zfp42	zinc finger protein 42	Chr8:43295063-43306980	2.56e-05
SGCGCSAAAH	E2f5	E2F transcription factor 5	Chr3:14578641-14606309	0.00694
